# Supplementary material for: Evaluation of atmospheric rivers in reanalyses and climate models in a new metrics framework
Source: Copernicus journal article supplement (doi:10.5194/gmd-2024-142), 2024-08-20
Supplement: Supplementary file 1 [file gmd-2024-142-supplement.pdf]

## supplementary material

Table S1 Lat-lon boundary for the geographic regions in Fig. 1

Table S2. Effective sample size ( $N_e$ ) for the spatial pattern correlation of AR frequency for each ocean basin.

Fig. S1. Time slice of AR tags detected using TE algorithm on (a) ERA5 and (b) BCC-CSM2 data on 1979-01-01T00

Fig. S2. Same as Fig. S1b but for AR tags detected by (a) ARCONNECT, (b) TECA, (c) Mundhenk and (d) Lora detection method.

Fig. S3. Time slice of AR tags detected using TE algorithm on (a) E3SM-LR and (b) E3SM-HR data on 1984-01-01T0

Table S1. Lat-Ion boundaries for geographic regions in Fig. 1

| <b>Region</b>   | S. Africa            | Australia                | New Zealand            | S. America           | Alaska               | California           | Baja                 | N. Europe               | UK                      | Europe                    |
|-----------------|----------------------|--------------------------|------------------------|----------------------|----------------------|----------------------|----------------------|-------------------------|-------------------------|---------------------------|
| <b>Boundary</b> | 21-35.5°S<br>11-20°E | 23-35.5°S<br>112.8-120°E | 34-46.5°S<br>166-179°E | 30-56°S<br>68-76°W   | 42-51°N<br>119-126°W | 34-42°N<br>119-126°W | 20-34°N<br>105-119°W | 53-70°N<br>3.5-20°E     | 49.8-60°N<br>10°W - 2°E | 35-49.8°N<br>10°W - 3.5°E |
| <b>Region</b>   | W. Africa            | Greenland                | Antarctica             | E. Asia              | Pacific NW           | N. Pacific           | S. Pacific           | N. Atlantic             | S. Atlantic             | Indian Ocean              |
| <b>Boundary</b> | 10-35°N<br>5-19°W    | 59.5- 67°N<br>40-52°W    | 60-76°S<br>57-95°W     | 31-43°N<br>125-142°E | 42-51°N<br>119-126°W | 0-67°N<br>99°E-98°W  | 0-70°S<br>142°E-70°W | 0-75°N<br>80°W-<br>10°E | 0-70°S<br>70°W-20°E     | 0-70°S<br>30-120°E        |

Table S2. Effective sample size ( $N_e$ ) for the spatial pattern correlation of AR frequency for each ocean basin

|                         | <b>N. Pacific</b> | <b>S. Pacific</b> | <b>N. Atlantic</b> | <b>S. Atlantic</b> | <b>Indian Ocean</b> |
|-------------------------|-------------------|-------------------|--------------------|--------------------|---------------------|
| <b><math>N_e</math></b> | 16                | 27                | 14                 | 15                 | 19                  |

ERA5 1979-01-01T00

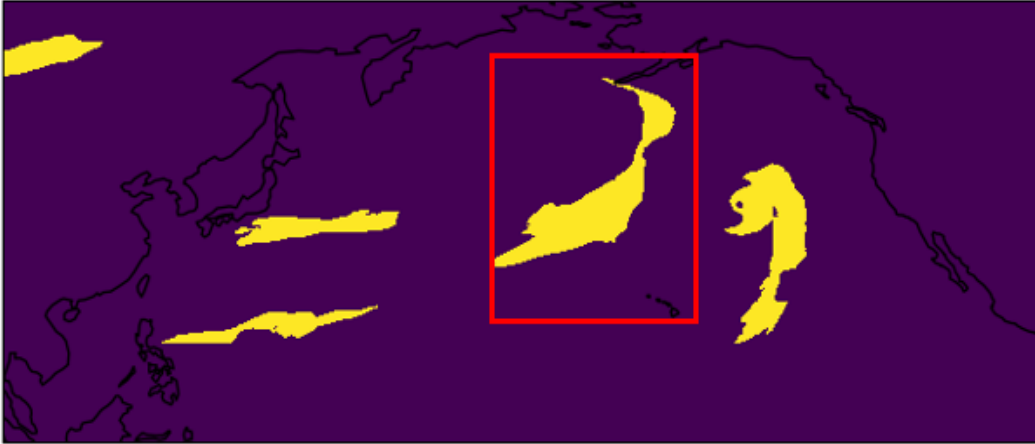

BCC 1979-01-01T00

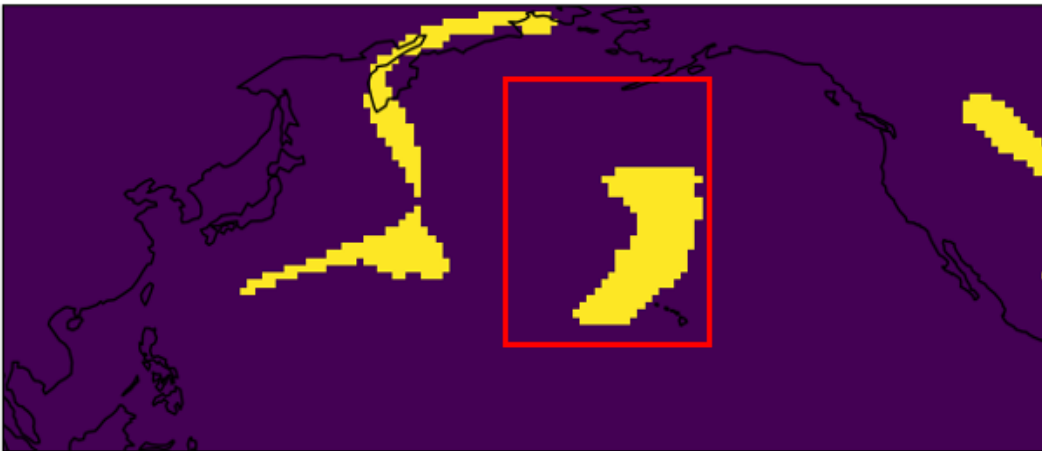

Fig. S1. Time slice of AR tags detected using TE algorithm on (a) ERA5 and (b) BCC-CSM2 data on 1979-01-01T00

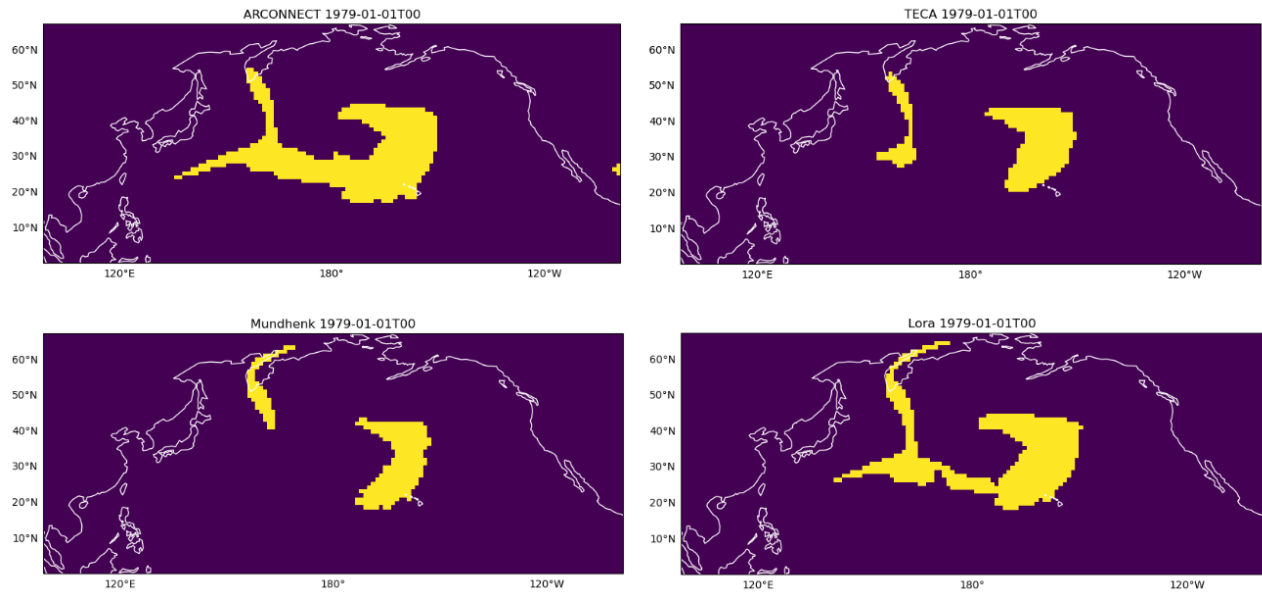

Fig. S2. Same as Fig. S1b but for AR tags detected by (a) ARCONNECT, (b) TECA, (c) Mundhenk and (d) Lora detection method.

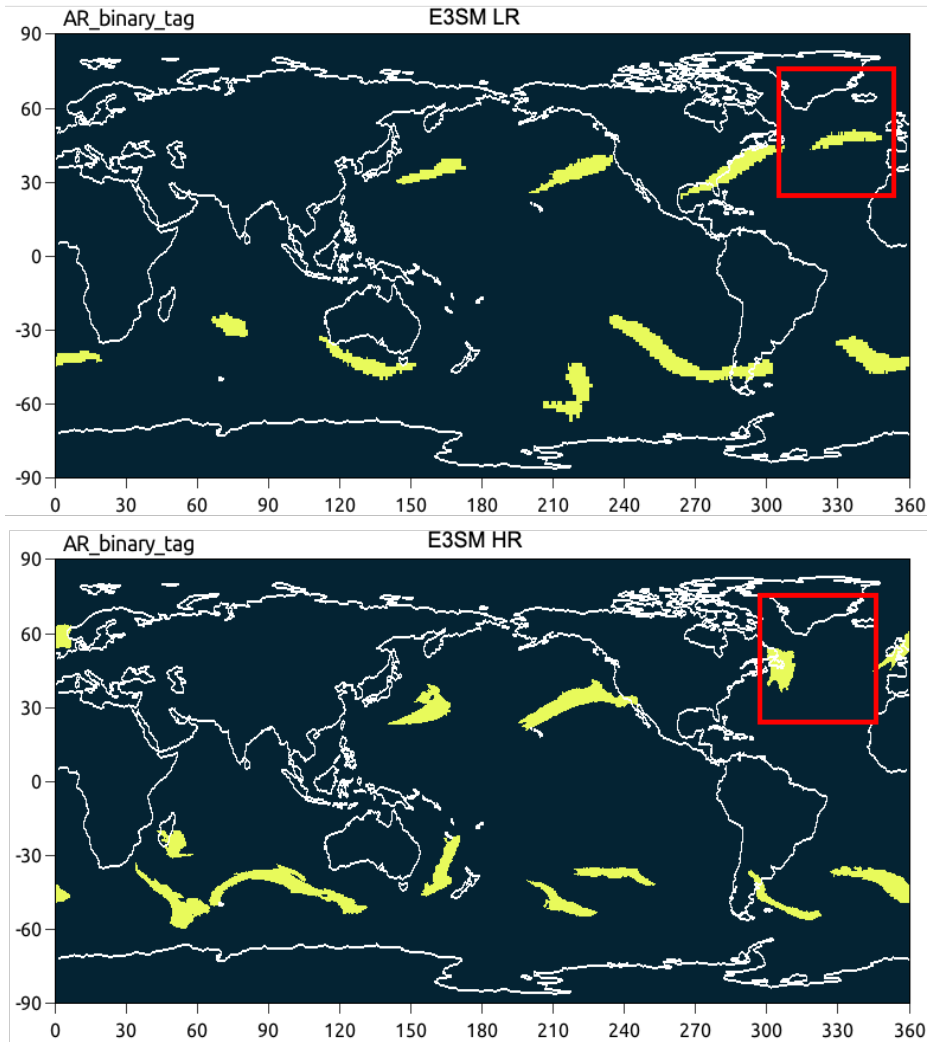

Fig. S3. Time slice of AR tags detected using TE algorithm on (a) E3SM-LR and (b) E3SM-HR data on 1984-01-01T00
